# Supplementary material
Source: publisher site journal article supplement (https://www.dovepress.com/article/418541)
Supplement: Supplementary file 1 [file get_supplementary_file.php]

# Appendix1. TREND Statement Checklist

| Paper Section/ Topic      | Item No. | Descriptor                                                                                                                                     | Reported? |                                              |
|---------------------------|----------|------------------------------------------------------------------------------------------------------------------------------------------------|-----------|----------------------------------------------|
|                           |          |                                                                                                                                                | ✓         | Pg #                                         |
| <b>TITLE and ABSTRACT</b> |          |                                                                                                                                                |           |                                              |
| Title and Abstract        | 1        | • Information on how units were allocated to interventions                                                                                     | X         | Abstract                                     |
|                           |          | • Structured abstract recommended                                                                                                              | X         | Abstract                                     |
|                           |          | • Information on target population or study sample                                                                                             | X         | Abstract                                     |
| <b>INTRODUCTION</b>       |          |                                                                                                                                                |           |                                              |
| Background                | 2        | • Scientific background and explanation of rationale                                                                                           | X         | Introduction                                 |
|                           |          | • Theories used in designing behavioral interventions                                                                                          |           | NA                                           |
| <b>METHODS</b>            |          |                                                                                                                                                |           |                                              |
| Participants              | 3        | • Eligibility criteria for participants, including criteria at different levels in recruitment/sampling plan (e.g., cities, clinics, subjects) | X         | Materials and methods, Data sources          |
|                           |          | • Method of recruitment (e.g., referral, self-selection), including the sampling method if a systematic sampling plan was implemented          | X         | Materials and methods, Data sources          |
|                           |          | • Recruitment setting                                                                                                                          |           | NA                                           |
|                           |          | • Settings and locations where the data were collected                                                                                         | X         | Materials and methods, Data sources          |
| Interventions             | 4        | • Details of the interventions intended for each study condition and how and when they were actually administered, specifically including:     | X         | Materials and methods, Intervention Measures |
|                           |          | ○ Content: what was given?                                                                                                                     | X         | Materials and methods, Intervention Measures |
|                           |          | ○ Delivery method: how was the content given?                                                                                                  | X         | Materials and methods, Intervention Measures |
|                           |          | ○ Unit of delivery: how were subjects grouped during delivery?                                                                                 |           | N/A                                          |
|                           |          | ○ Deliverer: who delivered the intervention?                                                                                                   | X         | Materials and methods, Intervention Measures |
|                           |          | ○ Setting: where was the intervention delivered?                                                                                               | X         | Materials and methods, Intervention Measures |
|                           |          | ○ Exposure quantity and duration: how many sessions or episodes or events were intended to be delivered? How long were they intended to last?  |           | N/A                                          |
|                           |          | ○ Time span: how long was it intended to take to deliver the intervention to each unit?                                                        |           | N/A                                          |
|                           |          | ○ Activities to increase compliance or adherence (e.g., incentives)                                                                            | X         | Materials and methods, Intervention Measures |
| Objectives                | 5        | • Specific objectives and hypotheses                                                                                                           | X         | Introduction                                 |

# Appendix1. TREND Statement Checklist

|                     |    |                                                                                                                                                                                                                                                                                         |   |                                           |
|---------------------|----|-----------------------------------------------------------------------------------------------------------------------------------------------------------------------------------------------------------------------------------------------------------------------------------------|---|-------------------------------------------|
| Outcomes            | 6  | <ul style="list-style-type: none"> <li>Clearly defined primary and secondary outcome measures</li> </ul>                                                                                                                                                                                | X | Materials and methods, Outcome measures   |
|                     |    | <ul style="list-style-type: none"> <li>Methods used to collect data and any methods used to enhance the quality of measurements</li> </ul>                                                                                                                                              | X | Materials and methods, Data sources       |
|                     |    | <ul style="list-style-type: none"> <li>Information on validated instruments such as psychometric and biometric properties</li> </ul>                                                                                                                                                    |   | NA                                        |
| Sample size         | 7  | <ul style="list-style-type: none"> <li>How sample size was determined and, when applicable, explanation of any interim analyses and stopping rules</li> </ul>                                                                                                                           |   | NA                                        |
| Assignment method   | 8  | <ul style="list-style-type: none"> <li>Unit of assignment (the unit being assigned to study condition, e.g., individual, group, community)</li> </ul>                                                                                                                                   | X | Materials and methods, Study design       |
|                     |    | <ul style="list-style-type: none"> <li>Method used to assign units to study conditions, including details of any restriction (e.g., blocking, stratification, minimization)</li> </ul>                                                                                                  | X | Materials and methods, Outcome measures   |
|                     |    | <ul style="list-style-type: none"> <li>Inclusion of aspects employed to help minimize potential bias induced due to non-randomization (e.g., matching)</li> </ul>                                                                                                                       | X | Materials and methods, Statistic analysis |
| Blinding (masking)  | 9  | <ul style="list-style-type: none"> <li>Whether or not participants, those administering the interventions, and those assessing the outcomes were blinded to study condition assignment; if so, statement regarding how the blinding was accomplished and how it was assessed</li> </ul> |   | NA                                        |
| Unit of Analysis    | 10 | <ul style="list-style-type: none"> <li>Description of the smallest unit that is being analysed to assess intervention effects (e.g., individual, group, or community)</li> </ul>                                                                                                        | X | Materials and methods, Statistic analysis |
|                     |    | <ul style="list-style-type: none"> <li>If the unit of analysis differs from the unit of assignment, the analytical method used to account for this (e.g., adjusting the standard error estimates by the design effect or using multilevel analysis)</li> </ul>                          |   | NA                                        |
| Statistical methods | 11 | <ul style="list-style-type: none"> <li>Statistical methods used to compare study groups for primary methods outcome(s), including complex methods for correlated data</li> </ul>                                                                                                        | X | Materials and methods, Statistic analysis |
|                     |    | <ul style="list-style-type: none"> <li>Statistical methods used for additional analyses, such as subgroup analyses and adjusted analysis</li> </ul>                                                                                                                                     | X | Materials and methods, Statistic analysis |
|                     |    | <ul style="list-style-type: none"> <li>Methods for imputing missing data, if used</li> </ul>                                                                                                                                                                                            |   | NA                                        |
|                     |    | <ul style="list-style-type: none"> <li>Statistical software or programs used</li> </ul>                                                                                                                                                                                                 | X | Materials and methods, Statistic analysis |
| <b>RESULTS</b>      |    |                                                                                                                                                                                                                                                                                         |   |                                           |
| Participant flow    | 12 | <ul style="list-style-type: none"> <li>Flow of participants through each stage of the study: enrollment, assignment, allocation and intervention exposure, follow-up, analysis (a diagram is strongly recommended)</li> </ul>                                                           |   | NA                                        |
|                     |    | <ul style="list-style-type: none"> <li>o Enrollment: the numbers of participants screened for eligibility, found to be eligible or not eligible, declined to be enrolled, and enrolled in the study</li> </ul>                                                                          |   | NA                                        |
|                     |    | <ul style="list-style-type: none"> <li>o Assignment: the numbers of participants assigned to a study condition</li> </ul>                                                                                                                                                               |   | NA                                        |
|                     |    | <ul style="list-style-type: none"> <li>o Allocation and intervention exposure: the number of participants assigned to each study condition and the number of participants who received each intervention</li> </ul>                                                                     |   | NA                                        |
|                     |    | <ul style="list-style-type: none"> <li>o Follow-up: the number of participants who completed the follow-up or did not complete the follow-up (i.e., lost to follow-up), by study condition</li> </ul>                                                                                   |   | NA                                        |
|                     |    | <ul style="list-style-type: none"> <li>o Analysis: the number of participants included in or excluded from the main analysis, by study condition</li> </ul>                                                                                                                             |   | NA                                        |
|                     |    | <ul style="list-style-type: none"> <li>Description of protocol deviations from study as planned, along with reasons</li> </ul>                                                                                                                                                          |   | NA                                        |
| Recruitment         | 13 | <ul style="list-style-type: none"> <li>Dates defining the periods of recruitment and follow-up</li> </ul>                                                                                                                                                                               |   | NA                                        |
| Baseline data       | 14 | <ul style="list-style-type: none"> <li>Baseline demographic and clinical characteristics of participants in each study condition</li> </ul>                                                                                                                                             | X | Results, Table1                           |

# Appendix 1. TREND Statement Checklist

|                         |    |                                                                                                                                                                                                                                                                                                                                  |   |                            |
|-------------------------|----|----------------------------------------------------------------------------------------------------------------------------------------------------------------------------------------------------------------------------------------------------------------------------------------------------------------------------------|---|----------------------------|
|                         |    | <ul style="list-style-type: none"> <li>• Baseline characteristics for each study condition relevant to specific disease prevention research</li> </ul>                                                                                                                                                                           |   | NA                         |
|                         |    | <ul style="list-style-type: none"> <li>• Baseline comparisons of those lost to follow-up and those retained, overall and by study condition</li> </ul>                                                                                                                                                                           |   | NA                         |
|                         |    | <ul style="list-style-type: none"> <li>• Comparison between study population at baseline and target population of interest</li> </ul>                                                                                                                                                                                            | X | Results, Baseline data     |
| Baseline equivalence    | 15 | <ul style="list-style-type: none"> <li>• Data on study group equivalence at baseline and statistical methods used to control for baseline differences</li> </ul>                                                                                                                                                                 |   | NA                         |
| Numbers analyzed        | 16 | <ul style="list-style-type: none"> <li>• Number of participants (denominator) included in each analysis for each study condition, particularly when the denominators change for different outcomes; statement of the results in absolute numbers when feasible</li> </ul>                                                        | X | Results, Table2 and Table3 |
|                         |    | <ul style="list-style-type: none"> <li>• Indication of whether the analysis strategy was “intention to treat” or, if not, description of how non-compliers were treated in the analyses</li> </ul>                                                                                                                               |   | NA                         |
| Outcomes and estimation | 17 | <ul style="list-style-type: none"> <li>• For each primary and secondary outcome, a summary of results for each estimation study condition, and the estimated effect size and a confidence interval to indicate the precision</li> </ul>                                                                                          | X | Results, Table2 and Table3 |
|                         |    | <ul style="list-style-type: none"> <li>• Inclusion of null and negative findings</li> </ul>                                                                                                                                                                                                                                      | X | NA                         |
|                         |    | <ul style="list-style-type: none"> <li>• Inclusion of results from testing pre-specified causal pathways through which the intervention was intended to operate, if any</li> </ul>                                                                                                                                               |   | NA                         |
| Ancillary analyses      | 18 | <ul style="list-style-type: none"> <li>• Summary of other analyses performed, including subgroup or restricted analyses, indicating which are pre-specified or exploratory</li> </ul>                                                                                                                                            | X | Results, Table3            |
| Adverse events          | 19 | <ul style="list-style-type: none"> <li>• Summary of all important adverse events or unintended effects in each study condition (including summary measures, effect size estimates, and confidence intervals)</li> </ul>                                                                                                          |   | NA                         |
| <b>DISCUSSION</b>       |    |                                                                                                                                                                                                                                                                                                                                  |   |                            |
| Interpretation          | 20 | <ul style="list-style-type: none"> <li>• Interpretation of the results, taking into account study hypotheses, sources of potential bias, imprecision of measures, multiplicative analyses, and other limitations or weaknesses of the study</li> </ul>                                                                           | X | Discussion                 |
|                         |    | <ul style="list-style-type: none"> <li>• Discussion of results taking into account the mechanism by which the intervention was intended to work (causal pathways) or alternative mechanisms or explanations</li> </ul>                                                                                                           | X | Discussion                 |
|                         |    | <ul style="list-style-type: none"> <li>• Discussion of the success of and barriers to implementing the intervention, fidelity of implementation</li> </ul>                                                                                                                                                                       | X | Discussion                 |
|                         |    | <ul style="list-style-type: none"> <li>• Discussion of research, programmatic, or policy implications</li> </ul>                                                                                                                                                                                                                 | X | Discussion                 |
| Generalizability        | 21 | <ul style="list-style-type: none"> <li>• Generalizability (external validity) of the trial findings, taking into account the study population, the characteristics of the intervention, length of follow-up, incentives, compliance rates, specific sites/settings involved in the study, and other contextual issues</li> </ul> | X | Discussion, Conclusion     |
| Overall evidence        | 22 | <ul style="list-style-type: none"> <li>• General interpretation of the results in the context of current evidence and current theory</li> </ul>                                                                                                                                                                                  | X | Conclusion                 |

From: Des Jarlais, D. C., Lyles, C., Crepaz, N., & the Trend Group (2004). Improving the reporting quality of nonrandomized evaluations of behavioral and public health interventions: The TREND statement. *American Journal of Public Health*, 94, 361-366. For more information, visit: <http://www.cdc.gov/trendstatement>

## Appendix 2: The TIDieR (Template for Intervention Description and Replication) Checklist\*:

Information to include when describing an intervention and the location of the information

| Item number | Item                                                                                                                                                                                                                                                                                                                | Where located **                        |                       |
|-------------|---------------------------------------------------------------------------------------------------------------------------------------------------------------------------------------------------------------------------------------------------------------------------------------------------------------------|-----------------------------------------|-----------------------|
|             |                                                                                                                                                                                                                                                                                                                     | Primary paper (page or appendix number) | Other † (details)     |
| 1.          | <b>BRIEF NAME</b><br>Provide the name or a phrase that describes the intervention.                                                                                                                                                                                                                                  | <b>Abstract</b>                         | <b>N/A</b>            |
| 2.          | <b>WHY</b><br>Describe any rationale, theory, or goal of the elements essential to the intervention.                                                                                                                                                                                                                | <b>Introduce</b>                        | <b>N/A</b>            |
| 3.          | <b>WHAT</b><br>Materials: Describe any physical or informational materials used in the intervention, including those provided to participants or used in intervention delivery or in training of intervention providers.<br>Provide information on where the materials can be accessed (e.g. online appendix, URL). | <b>Materials and methods</b>            | <b>Ref. 6</b>         |
| 4.          | Procedures: Describe each of the procedures, activities, and/or processes used in the intervention, including any enabling or support activities.<br><b>WHO PROVIDED</b>                                                                                                                                            | <b>Materials and methods</b>            | <b>N/A</b>            |
| 5.          | For each category of intervention provider (e.g. psychologist, nursing assistant), describe their expertise, background and any specific training given.<br><b>HOW</b>                                                                                                                                              | <b>Materials and methods</b>            | <b>N/A</b>            |
| 6.          | Describe the modes of delivery (e.g. face-to-face or by some other mechanism, such as internet or telephone) of the intervention and whether it was provided individually or in a group.<br><b>WHERE</b>                                                                                                            | <b>Materials and methods</b>            | <b>Ref. 6, Ref. 7</b> |
| 7.          | Describe the type(s) of location(s) where the intervention occurred, including any necessary infrastructure or relevant features.                                                                                                                                                                                   | <b>Materials and methods</b>            | <b>Ref. 8</b>         |

## Appendix 2: The TIDieR (Template for Intervention Description and Replication) Checklist\*:

| <b>WHEN and HOW MUCH</b> |                                                                                                                                                                                   |                              |     |
|--------------------------|-----------------------------------------------------------------------------------------------------------------------------------------------------------------------------------|------------------------------|-----|
| 8.                       | Describe the number of times the intervention was delivered and over what period of time including the number of sessions, their schedule, and their duration, intensity or dose. | <b>Materials and methods</b> | N/A |
| <b>TAILORING</b>         |                                                                                                                                                                                   |                              |     |
| 9.                       | If the intervention was planned to be personalised, titrated or adapted, then describe what, why, when, and how.                                                                  | <b>Materials and methods</b> | N/A |
| <b>MODIFICATIONS</b>     |                                                                                                                                                                                   |                              |     |
| 10.*                     | If the intervention was modified during the course of the study, describe the changes (what, why, when, and how).                                                                 | N/A                          | N/A |
| <b>HOW WELL</b>          |                                                                                                                                                                                   |                              |     |
| 11.                      | Planned: If intervention adherence or fidelity was assessed, describe how and by whom, and if any strategies were used to maintain or improve fidelity, describe them.            | <b>Materials and methods</b> | N/A |
| 12.*                     | Actual: If intervention adherence or fidelity was assessed, describe the extent to which the intervention was delivered as planned.                                               | N/A                          | N/A |

\*\* **Authors** - use N/A if an item is not applicable for the intervention being described. **Reviewers** – use ‘?’ if information about the element is not reported/not sufficiently reported.

† If the information is not provided in the primary paper, give details of where this information is available. This may include locations such as a published protocol or other published papers (provide citation details) or a website (provide the URL).

‡ If completing the TIDieR checklist for a protocol, these items are not relevant to the protocol and cannot be described until the study is complete.

\* We strongly recommend using this checklist in conjunction with the TIDieR guide (see *BMJ* 2014;348:g1687) which contains an explanation and elaboration for each item.

\* The focus of TIDieR is on reporting details of the intervention elements (and where relevant, comparison elements) of a study. Other elements and methodological features of studies are covered by other reporting statements and checklists and have not been duplicated as part of the TIDieR checklist. When a **randomised trial** is being reported, the TIDieR checklist should be used in conjunction with the CONSORT statement (see [www.consort-statement.org](http://www.consort-statement.org)) as an extension of **Item 5 of the CONSORT 2010 Statement**. When a **clinical trial protocol** is being reported, the TIDieR checklist should be used in conjunction with the SPIRIT statement as an extension of **Item 11 of the SPIRIT 2013 Statement** (see [www.spirit-statement.org](http://www.spirit-statement.org)). For alternate study designs, TIDieR can be used in conjunction with the appropriate checklist for that study design (see [www.equator-network.org](http://www.equator-network.org)).

**Appendix 3.** Number of daily full medical orders in different sample hospitals from 2016 to 2020

| Hospital code | Number of daily full medical orders |      |      |      |      |
|---------------|-------------------------------------|------|------|------|------|
|               | 2016                                | 2017 | 2018 | 2019 | 2020 |
| GZ301         | 2670                                | 397  | 461  | 388  | 151  |
| GZ302         | 335                                 | 219  | 208  | 342  | 1072 |
| GZ303         | 1181                                | 1104 | 879  | 931  | 701  |
| GZ304         | 581                                 | 542  | 542  | 558  | 469  |
| GZ305         | 1125                                | 1323 | 1143 | 1382 | 817  |
| GZ306         | 1327                                | 2296 | 2493 | 1704 | 236  |
| GZ307         | 721                                 | 762  | 671  | 536  | 388  |
| GZ308         | 810                                 | 735  | 589  | 175  | 101  |
| GZ309         | 289                                 | 353  | 236  | 223  | 110  |

#### **Appendix 4.** The addition coefficient in Guangzhou medical institutions of 2018

---

| Index coefficient                         | Weight coefficient                                                                                                                                                                                                                                         | Index meaning                                                                 |
|-------------------------------------------|------------------------------------------------------------------------------------------------------------------------------------------------------------------------------------------------------------------------------------------------------------|-------------------------------------------------------------------------------|
| Case mix index<br>(CMI)                   | When $CMI \geq 1$ , the addition is 1%; for every 0.1 increase in CMI, the addition coefficient increases by 1%, and the maximum addition is 10%.                                                                                                          | Reflecting the complexity of the combination of admitted and treated diseases |
| Elderly patients aged 60 and above        | When the proportion of elderly hospitalizations is greater than or equal to the city's average level, the addition is 1%. For every 0.1% increase in the average level, the addition coefficient will increase by 1%, and the maximum addition will be 5%. | Reflecting the medical treatment situation of special populations             |
| High-level medical institution assessment | Addition of 0.5%                                                                                                                                                                                                                                           | Summit Program Medical Institutions                                           |
| Key specialty assessment                  | 0.5% addition for key specialties established by governments at all levels                                                                                                                                                                                 | Reflecting the technical level of medical institutions                        |
| Hierarchical management assessment        | AAA level adds 1.0%.<br>AA level adds 0.5%                                                                                                                                                                                                                 | Reflect the level of service management of medical institutions               |

---

AAA, Level of Hierarchical management assessment
